# Supplementary material
Source: PubMed Central journal article supplement (PMC7504545)
Supplement: NIHMS1626083-supplement-Supplementary_Files.pdf [file NIHMS1626083-supplement-Supplementary_Files.pdf]

# Supplementary Figure 1

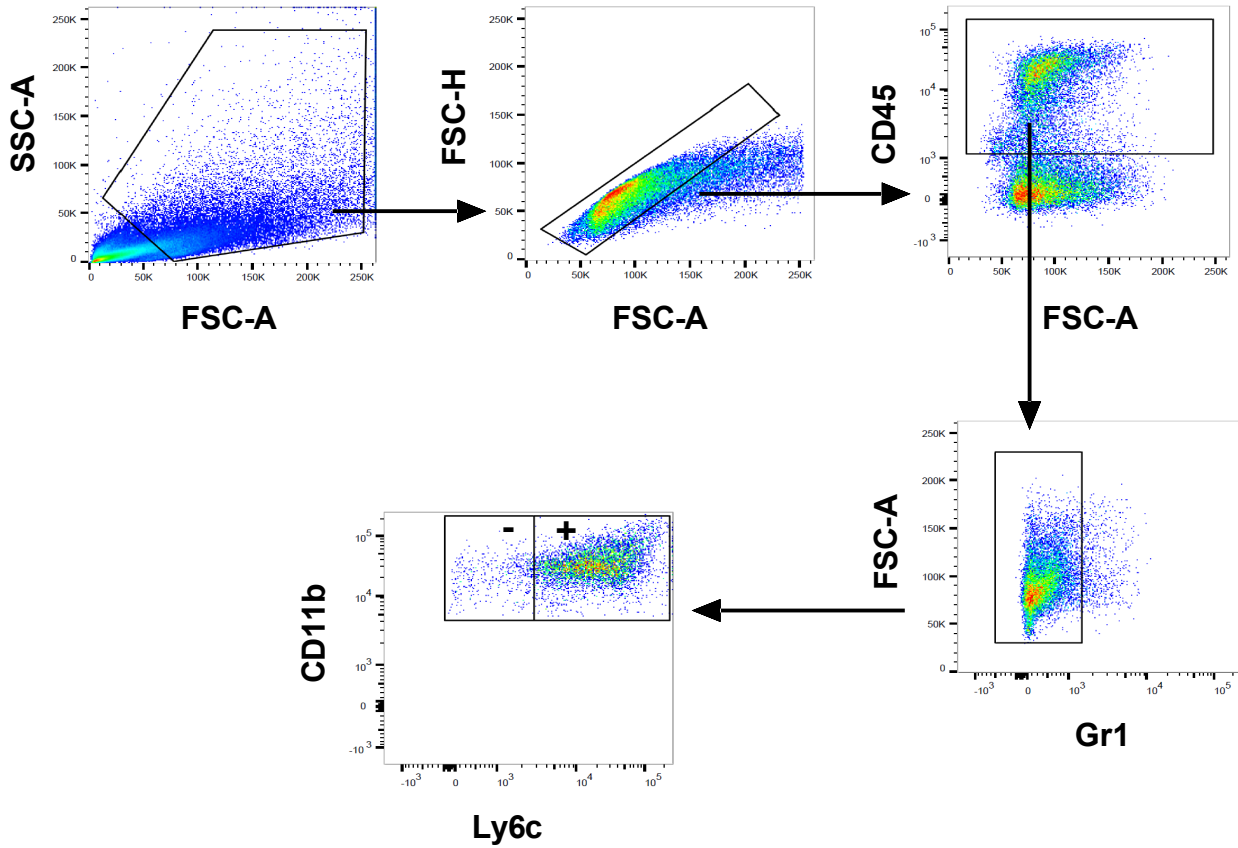

**Supplementary Figure 1. Gating strategy for identifying immune cell inflammatory phenotype of the TA muscle.** Single-cell suspensions were prepared from uninjured and injured TA muscles and were analyzed by flow cytometry for the indicated markers. Top row of plots: gating strategy to isolate non-granular myeloid cells (CD45<sup>+</sup>, Gr1<sup>-</sup>, CD11b/Mac1<sup>+</sup>) and quantify Ly6c expression.

## Supplementary Figure 2

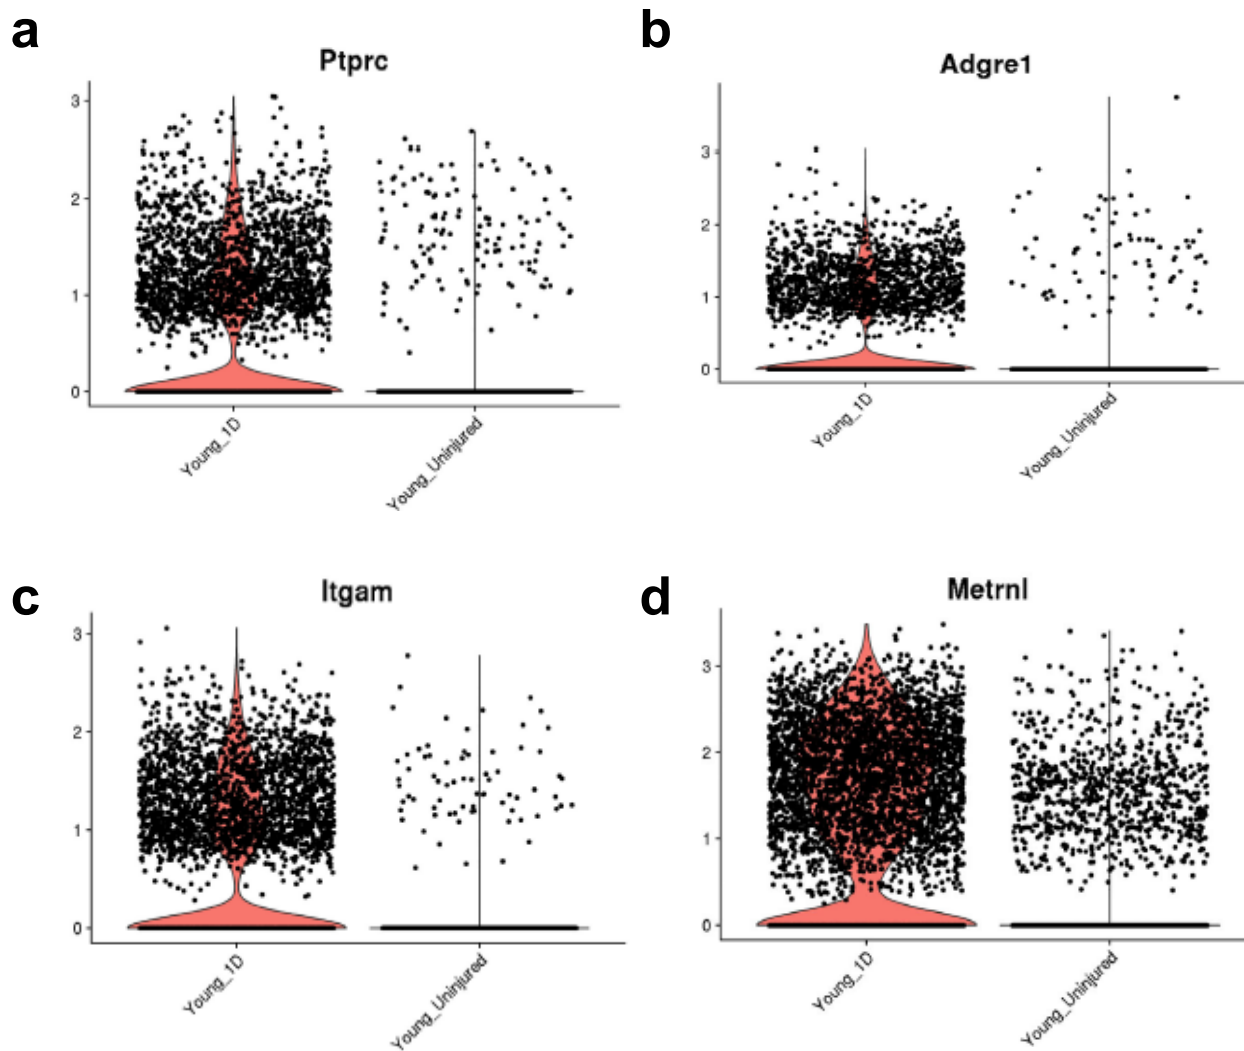

**Supplementary Figure 2. Metrnl gene expression after injury is associated with myeloid-based immune cell influx.** Violin plots from single cell RNAseq analysis. Plots of (A). Ptprc, (B). Adgre1, (C). Itgam and (D). Metrnl. Each dot represents individual cells and their relative gene expression. (N=1/group).

## Supplementary Figure 3

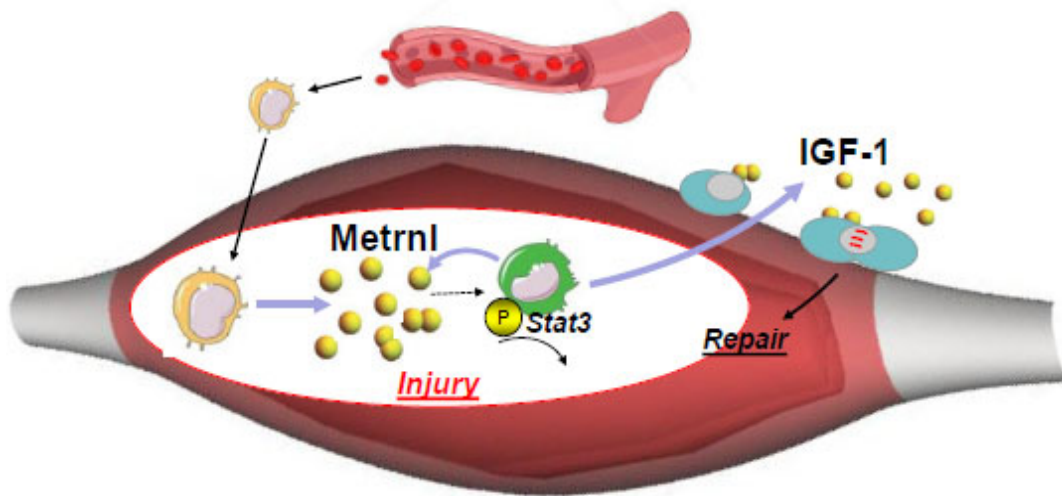

### Supplementary Figure 3. Working model for Metrnl regulation on skeletal muscle regeneration.

Our working model showing the influx of pro-inflammatory macrophages (orange) into the injured muscle secreting Metrnl in an autocrine/paracrine manner to activate Stat3 and stimulate the transformation to an anti-inflammatory phenotype (green). The anti-inflammatory macrophages secrete Metrnl as well, acting in a paracrine manner to incoming macrophages. In addition, the Metrnl-induced induction of IGF-1 is secreted from the macrophage promoting local satellite cell proliferation and eventual myogenesis and repair of the injured tissue.

Supplementary Table 1: Primers sets used in this manuscript

| <u>Gene Name</u>               | <u>Forward Primer</u>   | <u>Reverse Primer</u>   | <u>Species</u> |
|--------------------------------|-------------------------|-------------------------|----------------|
| <b>Arg1</b>                    | CTCCAAGCCAAAGTCCTTAGAG  | GGAGCTGTCATTAGGGACATCA  | mouse          |
| <b>Chi3l3</b>                  | CAGGTCTGGCAATTCTTCTGAA  | GTCTTGCTCATGTGTGTAAGTGA | mouse          |
| <b>Mrc1</b>                    | CTCTGTTTCAGCTATTGGACGC  | TGGCACTCCCAAACATAATTTGA | mouse          |
| <b>IL-10</b>                   | CTTACTGACTGGCATGAGGATCA | GCAGCTCTAGGAGCATGTGG    | mouse          |
| <b>TNF-<math>\alpha</math></b> | CAGGCGGTGCCTATGTCTC     | CGATCACCCCGAAGTTCAGTAG  | mouse          |
| <b>IL-1<math>\beta</math></b>  | GAAATGCCACCTTTTGACAGTG  | TGGATGCTCTCATCAGGACAG   | mouse          |
| <b>Nos2</b>                    | GTTCTCAGCCCAACAATACAAGA | GTGGACGGGTTCGATGTCAC    | mouse          |
| <b>IL-6</b>                    | CTGCAAGAGACTTCCATCCAG   | AGTGGTATAGACAGGTCTGTTGG | mouse          |
| <b>Metrn1</b>                  | TCTGTGGAGTGGATGTACCCA   | CCGCACCAACAGTCTTAGTTC   | mouse          |
| <b>IGF-1</b>                   | CACATCATGTTCGTCTTCACACC | GGAAGCAACACTCATCCACAATG | mouse          |
| <b>SOCS3</b>                   | TGCGCCTCAAGACCTTCAG     | GCTCCAGTAGAATCCGCTCTC   | mouse          |
| <b>Bcl3</b>                    | CCGGAGGCCCTTTACTACCA    | GGAGTAGGGGTGAGTAGGCAG   | mouse          |
| <b>TBP</b>                     | ATGATGCCTTACGGCACAGG    | GTTGCTGAGATGTTGATTGCTG  | mouse          |
| <b>Metrn1</b>                  | AGTGGATGTACCCAACAGGTG   | TACCAGCAGTCTCAGTTCTCC   | human          |
| <b>TBP</b>                     | CCACTCACAGACTCTCACAAC   | CTGCGGTACAATCCCAGAACT   | human          |

**Supplementary Table 2: Antibodies used in this manuscript**

| <b><u>Reagent</u></b>          | <b><u>Cat #</u></b> | <b><u>Concentration</u></b> | <b><u>Company</u></b>                               |
|--------------------------------|---------------------|-----------------------------|-----------------------------------------------------|
| BrdU-PE                        | 12-5071-42          | 1:250                       | invitrogen/ebiosource                               |
| eMHC                           | BF-45/F1.652        | 1:40                        | Developmental Studies Hybridoma Bank, Iowa City, IA |
| Rat anti mouse Alexa Flour 570 | 41-4015-82          | 1:2000                      | Life Technologies                                   |
| phosho Stat3 (tyr705)          | 9131                | 1:1000                      | Cell Signaling, Beverly, MA                         |
| mouse anti rabbit 2nd Ab       | 7074                | 1:2000                      | Cell Signaling, Beverly, MA                         |
| total Stat3                    | 9139                | 1:1000                      | Cell Signaling, Beverly, MA                         |
| VCAM -PE                       | 105703              | 1:200                       | Biolegend                                           |
| CD45 -PE Cy7                   | 25-0451-82          | 1:200                       | invitrogen/ebiosource                               |
| CD11b -488                     | 53-0112-82          | 1:200                       | invitrogen/ebiosource                               |
| Ly6c -APC                      | 128015              | 1:200                       | Biolegend                                           |
| Ly6g/Gr1 -702                  | 67-966-880          | 1:200                       | eBioscience                                         |
